# Supplementary material for: Effects of a Very-Low-Calorie Ketogenic Diet on the Fecal and Urinary Volatilome in an Obese Patient Cohort: A Preliminary Investigation
Source: MDPI journal article supplement (doi:10.3390/nu15173752), 2023-08-28
Supplement: s1 [file s1]

## Supplementary figures and tables

**Supplementary Figure S1.** BMI spaghetti graph. The spaghetti graph shows the reduction of BMI after VLCKD treatment ( $q < 0.05$ ).

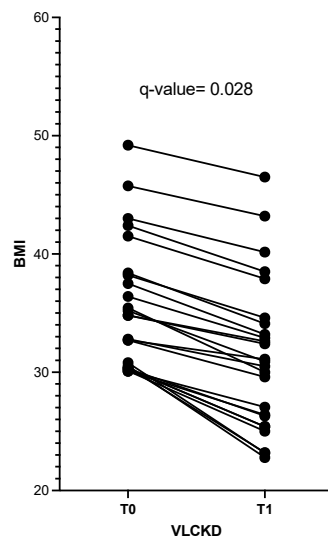

**Supplementary Figure S2.** Pearson's correlation between BMI and significant VOCs. BMI values and fecal/urinary metabolites were correlated by means of the R "corr.mtest" function and graphically rendered by using the R "corrplot package". Only statistically significant correlations were plotted. The color scaled bar indicates positive and negative correlations as green and purple circles, respectively. BMI relative correlations were indicated by aqua colored background squares.

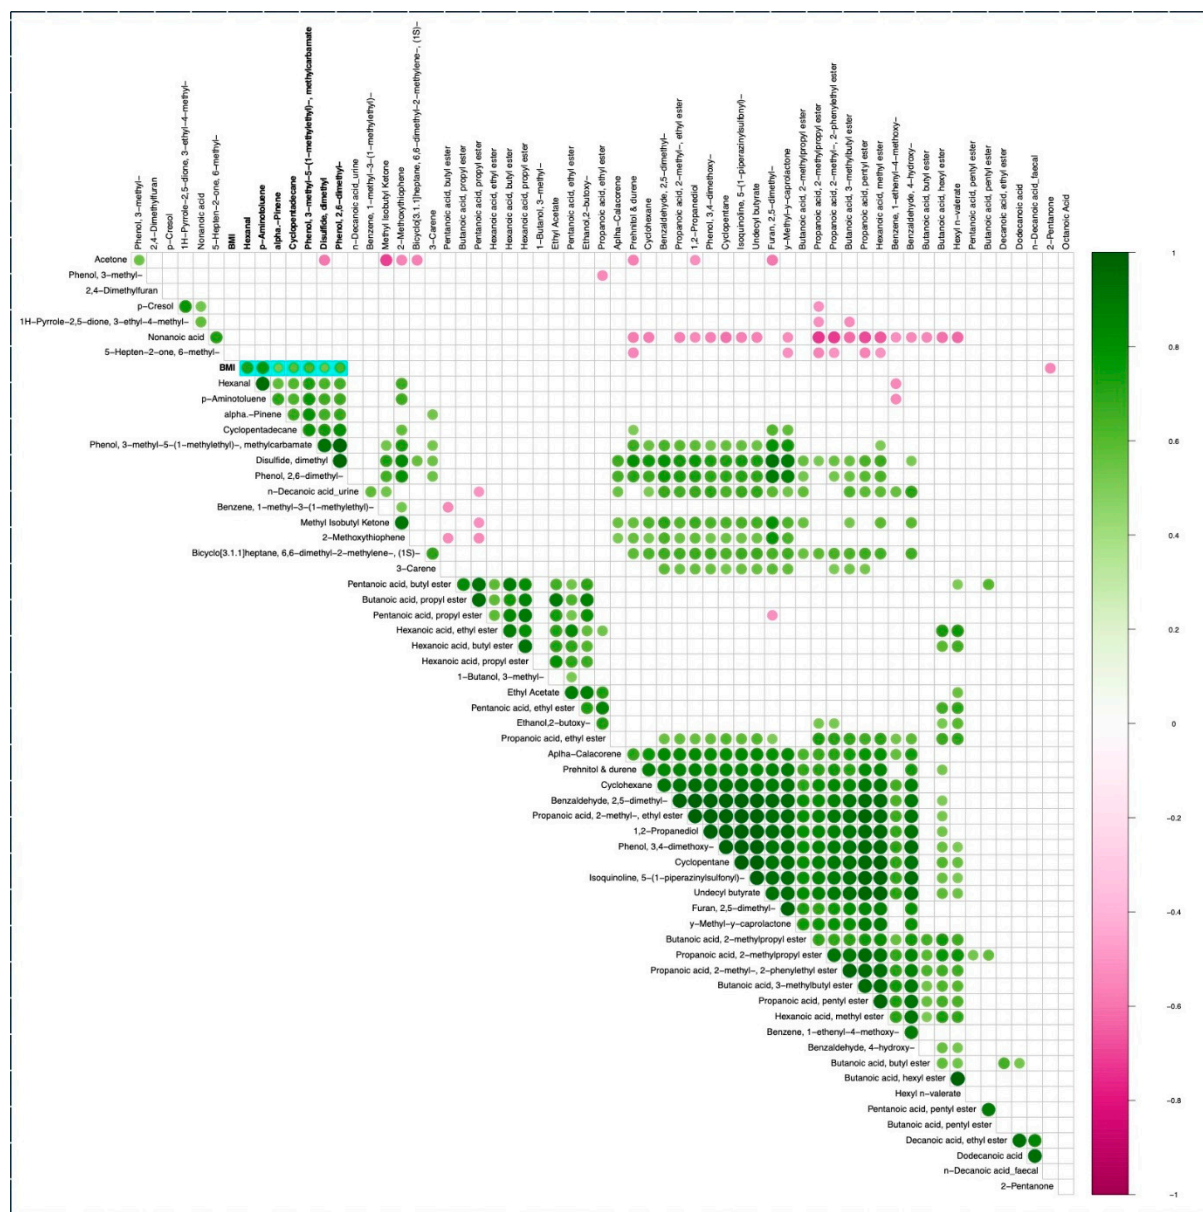

**Supplementary Figure S3.** Urinary indican (panel A) and urinary skatole (panel B) levels in patients with obesity before (T<sub>0</sub>) and after (T<sub>1</sub>) eight weeks of VLCKD. Data expressed as means  $\pm$  SEM. Wilcoxon matched-pairs signed-rank test was used to compare pre-treatment and post-treatment data. Differences were considered significant at  $p < 0.05$ . The dotted line indicates the cut-off level for dysbiosis: indican (20 mg/L) and skatole (20  $\mu$ g/L).

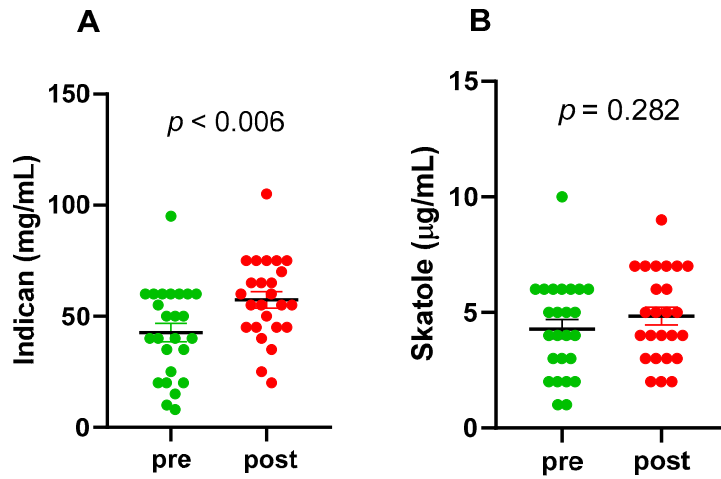

**Supplementary Table S1.** Wilcoxon rank sum test on faecal VOCs before and after the VLCKD. Statistically significant VOC emerging from the comparison between T<sub>0</sub> and T<sub>1</sub> groups have been reported together with their standard error of the mean (SEM). Underlined VOCs co-occurred in PLS-DA analysis.

| Statistically significant               | Average (SEM)          | Average (SEM)          | VLCKD                            |
|-----------------------------------------|------------------------|------------------------|----------------------------------|
| VOCs in faeces                          | VLCKD - T <sub>0</sub> | VLCKD - T <sub>1</sub> | T <sub>0</sub> Vs T <sub>1</sub> |
|                                         |                        |                        | (p value)                        |
| Ethanol,2-butoxy-                       | 1.36 $\pm$ 0.449       | 0.55 $\pm$ 0.433       | 0.0413                           |
| <u>alpha.-Pinene</u>                    | 1.27 $\pm$ 0.497       | 0.29 $\pm$ 0.141       | 0.02299                          |
| 1-Butanol, 3-methyl-                    | 1.59 $\pm$ 0.949       | 0.07 $\pm$ 0.02        | 0.00658                          |
| <u>1,2-Propanediol</u>                  | 0.04 $\pm$ 0.01        | 0.08 $\pm$ 0.016       | 0.00460                          |
| 1H-Pyrrole-2,5-dione, 3-ethyl-4-methyl- | 1.99 $\pm$ 0.273       | 3.87 $\pm$ 0.923       | 0.02748                          |
| 5-Hepten-2-one, 6-methyl-               | 5.28 $\pm$ 1.138       | 2.76 $\pm$ 0.639       | 0.03668                          |
| Benzaldehyde, 4-hydroxy-                | 0.02 $\pm$ 0.006       | 0.1 $\pm$ 0.039        | 0.04456                          |

|                                                         |            |            |         |
|---------------------------------------------------------|------------|------------|---------|
| Benzene, 1-methyl-3-(1-methylethyl)-                    | 0.4±0.184  | 0.13±0.106 | 0.04258 |
| Bicyclo[3.1.1]heptane, 6,6-dimethyl-2-methylene-, (1S)- | 1.35±0.501 | 0.14±0.089 | 0.01286 |
| Butanoic acid, 2-methylpropyl ester                     | 0.42±0.246 | 0.02±0.014 | 0.00391 |
| Butanoic acid, butyl ester                              | 2.83±1.136 | 0.91±0.766 | 0.00053 |
| <u>Butanoic acid, hexyl ester</u>                       | 0.73±0.304 | 0.02±0.013 | 0.00391 |
| Butanoic acid, propyl ester                             | 3.49±1.272 | 1.83±1.624 | 0.04248 |
| Cyclohexane                                             | 0.17±0.058 | 0.29±0.061 | 0.03607 |
| Cyclopentadecane                                        | 0.28±0.181 | 1.05±0.549 | 0.01343 |
| Cyclopentane                                            | 0.11±0.046 | 0.02±0.008 | 0.03906 |
| Decanoic acid, ethyl ester                              | 0.75±0.536 | 0.06±0.048 | 0.02734 |
| Dodecanoic acid                                         | 1.86±0.851 | 0.28±0.102 | 0.00056 |
| Ethyl Acetate                                           | 1.58±0.626 | 1.52±1.095 | 0.02899 |
| Hexanoic acid, butyl ester                              | 2.07±0.955 | 0.02±0.016 | 0.01172 |
| Hexanoic acid, propyl ester                             | 1.6±1.11   | 0.01±0.007 | 0.00195 |
| Hexyl n-valerate                                        | 0.7±0.313  | 0±0.004    | 0.00391 |
| Isoquinoline, 5-(1-piperazinylsulfonyl)-                | 0.03±0.011 | 0±0.003    | 0.00781 |
| n-Decanoic acid                                         | 4.41±2.36  | 0.75±0.197 | 0.01504 |
| Octanoic Acid                                           | 5.78±2.182 | 3.6±2.889  | 0.02027 |

|                                                      |            |            |          |
|------------------------------------------------------|------------|------------|----------|
| p-Aminotoluene                                       | 0.52±0.167 | 0.26±0.132 | 0.02899  |
| <u>Pentanoic acid, pentyl ester</u>                  | 1.57±0.818 | 0.07±0.048 | 0.03125  |
| Phenol, 3-methyl-5-(1-methylethyl)-, methylcarbamate | 0.29±0.08  | 0.08±0.023 | 0.01273  |
| Phenol, 3,4-dimethoxy-                               | 0±0.002    | 0.06±0.04  | 0.02099  |
| Propanoic acid, 2-methyl-, 2-phenylethyl ester       | 0.26±0.128 | 0.03±0.024 | 0.00085  |
| Propanoic acid, 2-methyl-, ethyl ester               | 0.09±0.04  | 0.03±0.012 | 0.03015  |
| Propanoic acid, 2-methylpropyl ester                 | 0.6±0.228  | 0.14±0.111 | 0.00488  |
| Propanoic acid, ethyl ester                          | 1.13±0.339 | 0.79±0.442 | 0.01597  |
| <u>Propanoic acid, pentyl ester</u>                  | 0.35±0.128 | 0.01±0.009 | 0.00391  |
| Undecyl butyrate                                     | 0.09±0.032 | 0±0.001    | 0.003916 |
| Butanoic acid, 3-methylbutyl ester                   | 0.3±0.12   | 0.01±0.004 | 0.01562  |
| Hexanoic acid, ethyl ester                           | 1.34±0.536 | 0.16±0.101 | 0.01660  |
| Hexanoic acid, methyl ester                          | 0.16±0.084 | n.d.       | 0.03125  |
| Pentanoic acid, ethyl ester                          | 1.49±0.455 | 0.58±0.337 | 0.02496  |
| 3-Carene                                             | 1.47±0.56  | 0.37±0.23  | 0.01245  |
| <u>Butanoic acid, pentyl ester</u>                   | 1.73±0.737 | 0.18±0.159 | 0.00195  |
| <u>Pentanoic acid, butyl ester</u>                   | 2.73±1.046 | 0.27±0.147 | 0.00201  |

|                              |              |            |         |
|------------------------------|--------------|------------|---------|
| Pentanoic acid, propyl ester | 2.45±0.99    | 0.28±0.246 | 0.02685 |
| Phenol, 3-methyl             | 75.65±29.212 | n.d.       | 0.01562 |

---

**Supplementary Table S2.** Wilcoxon rank sum test on urine VOCs before and after the VLCKD. Statistically significant VOCs have been listed based on statistically significant p-values. Standard error of the mean (SEM) has been reported for sample belonging to T0 and T1 groups. Underlined VOC are co-occurrent in PLS-DA analysis.

| <b>Statistically significant<br/>VOCs in urines</b> | <b>Average (SEM)<br/>VLCKD - T0</b> | <b>Average (SEM)<br/>VLCKD - T1</b> | <b>VLCKD<br/>T0 Vs T1 (p<br/>value)</b> |
|-----------------------------------------------------|-------------------------------------|-------------------------------------|-----------------------------------------|
| <u>Acetone</u>                                      | 2.01±0.605                          | 25.43±5.433                         | 0.000003                                |
| <u>Furan, 2,5-dimethyl-</u>                         | 0.36±0.04                           | 0.24±0.032                          | 0.003052                                |
| 2-Pentanone                                         | 3.51±1.058                          | 4.15±0.629                          | 0.029106                                |
| 2,4-Dimethylfuran                                   | 0.87±0.445                          | 0.26±0.227                          | 0.023438                                |
| <u>Disulfide, dimethyl</u>                          | 0.51±0.056                          | 0.33±0.044                          | 0.018242                                |
| <u>Methyl Isobutyl Ketone</u>                       | 1.59±0.102                          | 1.08±0.1                            | 0.002198                                |
| <u>Hexanal</u>                                      | 3±0.382                             | 1.26±0.275                          | 0.00025                                 |
| <u>2-Methoxythiophene</u>                           | 1.25±0.111                          | 0.66±0.106                          | 0.000056                                |
| Phenol, 2,6-dimethyl-                               | 0.4±0.051                           | 0.3±0.03                            | 0.038599                                |
| Prehnitol & durene                                  | 0.5±0.055                           | 0.68±0.083                          | 0.030073                                |
| p-Cresol                                            | 3.77±0.455                          | 6.36±1.232                          | 0.029697                                |
| γ-Methyl-γ-caprolactone                             | 0.18±0.042                          | 0.25±0.031                          | 0.042262                                |
| <u>Benzene, 1-ethenyl-4-<br/>methoxy-</u>           | 0.02±0.021                          | 0.4±0.117                           | 0.001953                                |
| Benzaldehyde, 2,5-<br>dimethyl-                     | 0.09±0.019                          | 0.03±0.015                          | 0.00534                                 |
| Nonanoic acid                                       | 10.3±1.149                          | 13.25±1.281                         | 0.04215                                 |
| n-Decanoic acid                                     | 0.44±0.12                           | 0.76±0.153                          | 0.028931                                |
| Alpha-Calacorene                                    | 0.44±0.146                          | 1.06±0.253                          | 0.020599                                |

**Supplementary Table S3.** Pearson's correlation analysis between BMI and VOCs. If statistically significant, Pearson's correlation values and p-values relative to each correlation have been reported as bold font.

| <b>VOC</b>           | <b>correlation value against BMI</b> | <b>p-value</b>     |
|----------------------|--------------------------------------|--------------------|
| Acetone              | -0.016082126                         | 0.939181555        |
| Furan, 2,5-dimethyl- | 0.358920916                          | 0.078073049        |
| <b>2-Pentanone</b>   | <b>-0.546735197</b>                  | <b>0.004683707</b> |

|                                                             |                    |                    |
|-------------------------------------------------------------|--------------------|--------------------|
| 2,4-Dimethylfuran                                           | 0.269229487        | 0.19311611         |
| <b>Disulfide, dimethyl</b>                                  | <b>0.530633482</b> | <b>0.006354592</b> |
| Methyl Isobutyl Ketone                                      | 0.224796947        | 0.279989291        |
| <b>Hexanal</b>                                              | <b>0.713322244</b> | <b>6.26E-05</b>    |
| 2-Methoxythiophene                                          | 0.454060117        | 0.052607054        |
| <b>Phenol, 2,6-dimethyl-</b>                                | <b>0.600186995</b> | <b>0.001515141</b> |
| Prehnitol & durene                                          | 0.156191172        | 0.455928413        |
| p-Cresol                                                    | -0.261831474       | 0.206111728        |
| y-Methyl-y-caprolactone                                     | 0.351761647        | 0.08464156         |
| Benzene, 1-ethenyl-4-methoxy-                               | -0.3103245         | 0.131109168        |
| Benzaldehyde, 2,5-dimethyl-                                 | 0.298099664        | 0.147802774        |
| Nonanoic acid                                               | -0.059076994       | 0.779088366        |
| n-Decanoic acid_urine                                       | 0.095706452        | 0.649051466        |
| Aplha-Calacorene                                            | 0.294787268        | 0.152575681        |
| Ethanol,2-butoxy-                                           | -0.039664639       | 0.85068581         |
| <b>alpha.-Pinene</b>                                        | <b>0.505486576</b> | <b>0.009947829</b> |
| 1-Butanol, 3-methyl-                                        | 0.028185343        | 0.893609777        |
| 1,2-Propanediol                                             | 0.211504458        | 0.310142973        |
| 1H-Pyrrole-2,5-dione, 3-ethyl-4-methyl-                     | -0.304485666       | 0.138903241        |
| 5-Hepten-2-one, 6-methyl-                                   | -0.301533038       | 0.142968882        |
| Benzaldehyde, 4-hydroxy-                                    | -0.071736638       | 0.733284721        |
| Benzene, 1-methyl-3-(1-methylethyl)-                        | 0.362828752        | 0.074655013        |
| Bicyclo[3.1.1]heptane, 6,6-dimethyl-2-methylene-, (1S)-     | 0.028992453        | 0.890580853        |
| Butanoic acid, 2-methylpropyl ester                         | 0.105949829        | 0.614225831        |
| Butanoic acid, butyl ester                                  | -0.112012002       | 0.593985454        |
| Butanoic acid, hexyl ester                                  | -0.007361479       | 0.972140866        |
| Butanoic acid, propyl ester                                 | -0.11763174        | 0.575481203        |
| Cyclohexane                                                 | 0.116181797        | 0.580231074        |
| <b>Cyclopentadecane</b>                                     | <b>0.574791973</b> | <b>0.002652054</b> |
| Cyclopentane                                                | 0.220122934        | 0.290372401        |
| Decanoic acid, ethyl ester                                  | -0.00433944        | 0.983575585        |
| Dodecanoic acid                                             | -0.154260643       | 0.461584803        |
| Ethyl Acetate                                               | 0.001948025        | 0.992626502        |
| Hexanoic acid, butyl ester                                  | -0.175829041       | 0.400507683        |
| Hexanoic acid, propyl ester                                 | -0.125657796       | 0.549504301        |
| Hexyl n-valerate                                            | -0.019648757       | 0.925726592        |
| Isoquinoline, 5-(1-piperazinylsulfonyl)-                    | 0.22001951         | 0.290604852        |
| n-Decanoic acid_faecal                                      | -0.187746695       | 0.368811044        |
| Octanoic Acid                                               | -0.119000959       | 0.571011582        |
| <b>p-Aminotoluene</b>                                       | <b>0.764986033</b> | <b>8.44E-06</b>    |
| Pentanoic acid, pentyl ester                                | -0.073209797       | 0.728008544        |
| <b>Phenol, 3-methyl-5-(1-methylethyl)-, methylcarbamate</b> | <b>0.611363094</b> | <b>0.001166701</b> |



|                                                |              |             |
|------------------------------------------------|--------------|-------------|
| Phenol, 3,4-dimethoxy-                         | 0.217155473  | 0.297088249 |
| Propanoic acid, 2-methyl-, 2-phenylethyl ester | 0.160659378  | 0.442977465 |
| Propanoic acid, 2-methyl-, ethyl ester         | 0.256585656  | 0.215677834 |
| Propanoic acid, 2-methylpropyl ester           | 0.10799199   | 0.607375797 |
| Propanoic acid, ethyl ester                    | 0.090019871  | 0.66870456  |
| Propanoic acid, pentyl ester                   | 0.165768907  | 0.428411546 |
| Undecyl butyrate                               | 0.215048479  | 0.301915039 |
| Butanoic acid, 3-methylbutyl ester             | 0.163776472  | 0.434060265 |
| Hexanoic acid, ethyl ester                     | -0.1084425   | 0.605868944 |
| Hexanoic acid, methyl ester                    | 0.187934674  | 0.368323079 |
| Pentanoic acid, ethyl ester                    | 0.08428066   | 0.68875664  |
| 3-Carene                                       | 0.234493116  | 0.259210081 |
| Butanoic acid, pentyl ester                    | -0.157361249 | 0.452517922 |
| Pentanoic acid, butyl ester                    | -0.230354499 | 0.267953821 |
| Pentanoic acid, propyl ester                   | -0.187036158 | 0.370658875 |
| Phenol, 3-methyl-                              | -0.449184834 | 0.064289451 |
| BMI                                            | 1            | 0           |

- Bold font indicates statistically significant correlations.
